# Supplementary material
Source: HighWire-hosted journal article supplement (https://jnis.bmj.com/highwire/filestream/167047/field_highwire_adjunct_files/0/neurintsurg-2021-017507supp001_data_supplement.pdf)
Supplement: neurintsurg-2021-017507supp001_data_supplement.pdf [file neurintsurg-2021-017507supp001_data_supplement.pdf]

## SUPPLEMENTAL MATERIAL

The effect of first pass reperfusion on outcome in patients with posterior circulation ischemic stroke.

Supplement Table S1. Association between FPR and 24-hour NIHSS score with adjustment for patient clustering within each hospital.

|               | NIHSS at 24 hours |                               |
|---------------|-------------------|-------------------------------|
|               | Percentage change |                               |
|               | %<br>(95%CI)      | Adjusted %<br>(95%CI)         |
| FPR vs no FPR | -45% (-64 to -14) | -45% (-65 to -13)*            |
| FPR vs MPR    | -23% (-55 to 33)  | -15% (-52 to 50) <sup>†</sup> |

NIHSS, National Institutes of Health Stroke Scale, FPR, first pass reperfusion, MPR multiple pass reperfusion, no FPR = MPR (eTICI  $\geq$  2C in multiple passes) + no excellent reperfusion (eTICI < 2C, independent of number of passes)

\* adjusted for age, sex, history of hyperlipidemia.

<sup>†</sup> adjusted for age, sex, history of hyperlipidemia, posterior circulation Alberta stroke program early CT score.
